# Supplementary material for: Comparison of hyperpolarized 3He-MRI, CT based parametric response mapping, and mucus scores in asthmatics
Source: PubMed Central journal article supplement (PMC10431597; doi:10.3389/fphys.2023.1178339), 2023-08-01
Supplement: DataSheet1.pdf [file DataSheet1.pdf]

## Appendix A – Scan Parameters

| CT Parameter                  | 64 Detector CT |
|-------------------------------|----------------|
| Collimation                   | 64 X 0.625 mm  |
| Rotation Time (s)             | 0.5            |
| Pitch                         | 0.984          |
| Effective mAs                 | 100 - 180      |
| Peak Kilovoltage (kVp)        | 120            |
| Matrix                        | 512 x 512      |
| Acquired slice thickness (mm) | 0.625          |
| Interval (mm)                 | 0.5            |
| Reconstruction Algorithm      | Standard       |

**Table S1:** CT imaging acquisition parameters for both inspiratory and expiratory CTs obtained in this study.

| MRI Parameter                 | HP <sup>3</sup> He MRI          | Matching Proton MRI             |
|-------------------------------|---------------------------------|---------------------------------|
| Pulse sequence                | Fast 2D gradient echo           | 2D SSFSE                        |
| TR/TE                         | 6.5/2.9 ms                      | 450/37ms                        |
| Flip angle                    | 14°                             | 90°                             |
| Matrix                        | 128 x 128 in-slice              | 128 x 128 in-slice              |
| FOV                           | 40 cm                           | 40 cm                           |
| Reconstructed voxel dimension | 1.56 x 1.56 x 15 mm             | 1.56 x 1.56 x 15 mm             |
| Slices                        | Sufficient to cover lung volume | Sufficient to cover lung volume |

**Table S2:** MRI acquisition parameters for both HP <sup>3</sup>He MRI and the matching proton MRI that were acquired. **Definition of abbreviations:** TR – repetition time, TE – echo time, FOV – field of view.

|      | VDP      | Mucus Score | FEV1 PP   | FVC PP  | FEV1/FVC PP | FEF <sub>25-75</sub> PP |
|------|----------|-------------|-----------|---------|-------------|-------------------------|
| VDP  | --       | 0.68 ***    | -0.60 *** | -0.38 * | -0.60 ***   | -0.58**                 |
| fSAD | 0.65 *** | 0.55 **     | -0.56 *** | -0.35 * | -0.59 ***   | -0.57***                |
| Emph | 0.43 **  | 0.44        | -0.30     | -0.07   | -0.45 **    | -0.36*                  |

**Table S3:** Spearman correlation coefficients for whole lung VDP, and PRM<sub>fSAD</sub>, and PRM<sub>emph</sub> (listed on left) when compared to VDP, mucus score, and spirometry. PP=Percent Predicted. Significance Key: \**p*<0.05, \*\**p*<0.01, \*\*\**p*<0.001.

## **Appendix B – Statistical Model Details**

The model of best fit for comparing segmental fSAD as a function of VDP was a piecewise quadratic model. The model is fit to all segmental data while correcting for multiple data points from each segment. All segments fit to the same model, but each has a different intercept, or shift. The equations for the non-zero VDP piecewise models are given below. In both equations, B is a segment specific shift that differs between bronchopulmonary segments, but is the same value for both equations within the same segment.

**Piecewise equation for VDP>0 and absence of mucus plug:**

$$\log_{10} PRM_{fSAD} = 0.14(\log_{10} VDP)^2 + 0.29(\log_{10} VDP) + B$$

**Piecewise equation for VDP>0 and presence of mucus plug:**

$$\log_{10} PRM_{fSAD} = 0.21(\log_{10} VDP)^2 - 0.73(\log_{10} VDP) + 0.74 + B$$

Data used in this analysis are from the Severe Asthma Research Program and can be made publicly accessible upon request to the corresponding author (<https://sarp.hmc.psu.edu>).
